# Supplementary material
Source: HighWire-hosted journal article supplement (https://hw-f5-jim.highwire.org/content/jim-2021-001846)
Supplement: inline-supplementary-material-1 [file inline-supplementary-material-1.pdf]

Search 3/29/19

EMBASE results: 4,435

('latin america'/exp OR 'latin america' OR (latin AND ('america'/exp OR america)) OR 'peru'/exp OR peru OR 'ecuador'/exp OR ecuador OR 'colombia'/exp OR colombia OR 'venezuela'/exp OR venezuela OR brasil OR 'brazil'/exp OR brazil OR 'argentina'/exp OR argentina OR 'uruguay'/exp OR uruguay OR 'paraguay'/exp OR paraguay OR 'bolivia'/exp OR bolivia OR 'panama'/exp OR panama OR 'guatemala'/exp OR guatemala OR 'mexico'/exp OR mexico OR 'honduras'/exp OR honduras OR 'nicaragua'/exp OR nicaragua OR 'chile'/exp OR chile OR 'costa rica'/exp OR 'costa rica' OR (('costa'/exp OR costa) AND rica) OR 'dominican republic'/exp OR 'dominican republic' OR (dominican AND republic) OR 'puerto rico'/exp OR 'puerto rico' OR (puerto AND rico) OR 'cuba'/exp OR cuba) AND ('inflammatory bowel disease'/exp OR 'inflammatory bowel disease' OR (inflammatory AND ('bowel'/exp OR bowel) AND ('disease'/exp OR disease)))

MEDLINE results: 1,365

((Latin America OR Peru OR ecuador OR Colombia OR venezuela OR Brasil OR Brazil OR argentina OR uruguay OR paraguay OR Bolivia OR panama OR Guatemala OR mexico OR honduras OR nicaragua OR chile OR Costa Rica OR Dominican Republic OR Puerto Rico OR Cuba)) AND inflammatory bowel disease)
